# Supplementary material for: The Impact of Pyroglutamate:Sulfolobus acidocaldariusHas a Growth Advantage overSaccharolobus solfataricusin Glutamate-Containing Media
Source: Hindawi journal article supplement (doi:10.1155/2019/3208051), 2019-04-24
Supplement: f1 [file 3208051.f1.pdf]

## Supplementary Material

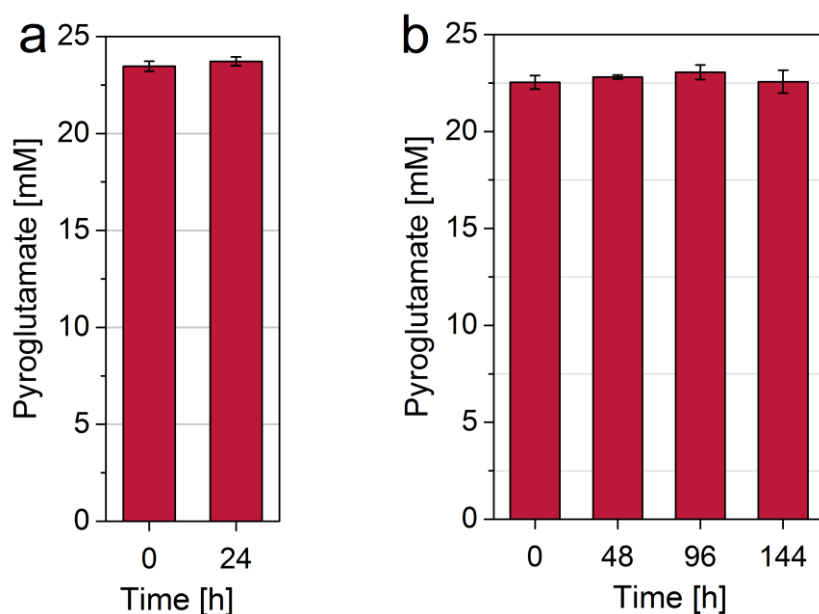

**Figure S1: Evaluation of pyroglutamate measurement procedure.** (a) Conformity of appointed and measured pyroglutamate concentrations. Pyroglutamate content in supernatant at time-point 0 h and 24 h of the *S. acidocaldarius* growth curve supplemented with 24 mM pyroglutamate (see Figure 2a). (b) Pyroglutamate stability at thermoacidophilic conditions. 22 mM pyroglutamate were cultivated in Brock Medium at 75°C and pH 3 for 144 h. Values represent the average of four independent cultivations and error bars represent the standard error.

**Table S1: Content of glutamate and pyroglutamate in crude cell extract assay of *Sulfolobus acidocaldarius* and *Saccharolobus solfataricus*.** Crude cell extracts (CE) of *S. acidocaldarius* MW001 (Saci) and *S. solfataricus* P2 (Sso) was incubated with 2.2 mM L-pyroglutamate (Glp) in presence and absence of 14 mM ATP (-ATP/+ATP) at 65°C for 24 h. Afterwards glutamate (Glu) and pyroglutamate content were determined. Values represent the average of four independent cultivations. Errors represent the standard error between the four experiments.

| Name        | Crude cell extract       | Supplementation |     | Content after incubation |             |
|-------------|--------------------------|-----------------|-----|--------------------------|-------------|
|             |                          | ATP             | Glp | Glu [mM]                 | Glp [mM]    |
| Glp control | -                        | +               | +   | 0.01 ± 0.00              | 2.20 ± 0.02 |
| CE control  | <i>S. acidocaldarius</i> | -               | -   | 0.23 ± 0.01              | 0.20 ± 0.02 |
|             | <i>S. solfataricus</i>   | -               | -   | 0.18 ± 0.01              | 0.26 ± 0.02 |
| CE – ATP    | <i>S. acidocaldarius</i> | -               | +   | 0.20 ± 0.01              | 2.34 ± 0.05 |
|             | <i>S. solfataricus</i>   | -               | +   | 0.14 ± 0.01              | 2.34 ± 0.03 |
| CE + ATP    | <i>S. acidocaldarius</i> | +               | +   | 1.11 ± 0.03              | 1.53 ± 0.05 |
|             | <i>S. solfataricus</i>   | +               | +   | 0.67 ± 0.02              | 1.92 ± 0.04 |

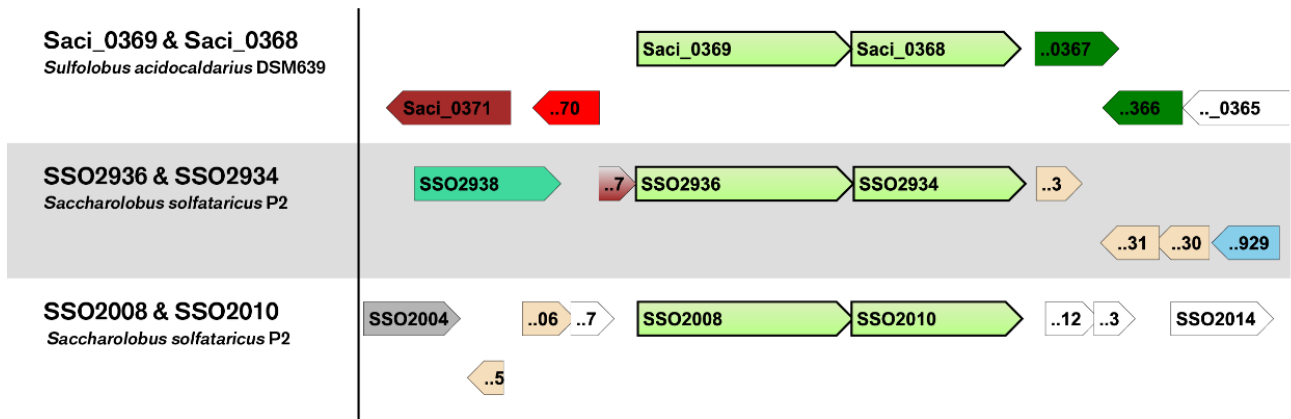

**Figure S2: Genomic context of all 5-oxoprolinase candidates from *Sulfolobus acidocaldarius* and *Saccharolobus solfataricus*.** This figure was created using the Microbial Genomic Context Viewer.

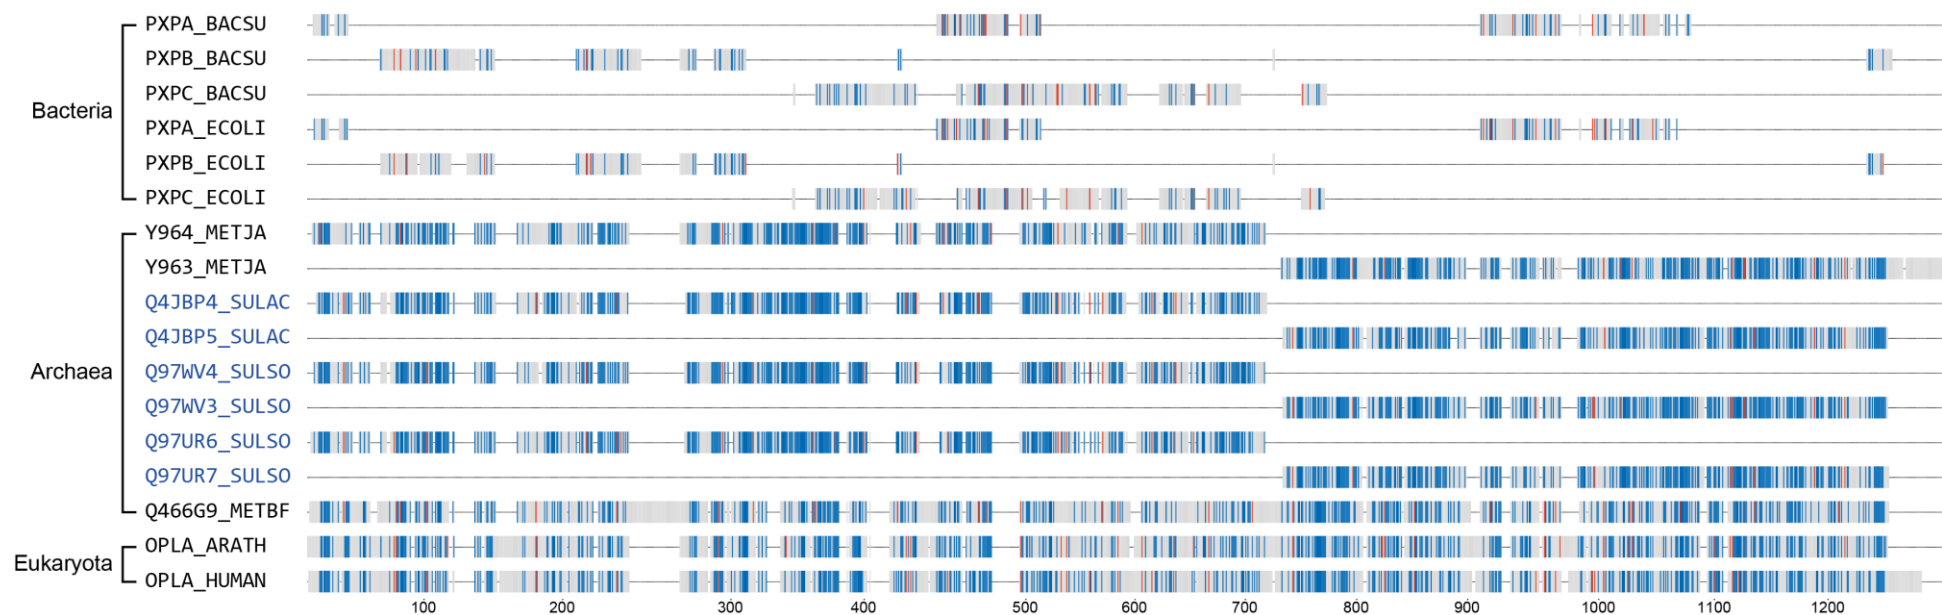

**Figure S2: Fingerprint of the multiple sequence alignment of 5-oxoprolinases from all three domains of life.** Blue sequence names indicate the 5-oxoprolinase candidates from *Sulfolobus acidocaldarius* and *Saccharolobus solfataricus*. Light gray shadings indicate non-conserved regions, blue shading shows over 30% conservation, and red shading indicates similar regions. Organisms: BACSU = *Bacillus subtilis* 168, ECOLI = *Escherichia coli* K12, METJA = *Methanocaldococcus jannaschii* JAL-1, SULAC = *Sulfolobus acidocaldarius* DSM 639, SULSO = *Saccharolobus solfataricus* P2, METBF = *Methanosarcina barkeri* DSM 804, ARATH = *Arabidopsis thaliana*, HUMAN = *Homo sapiens*.
